# Supplementary material
Source: PubMed Central journal article supplement (PMC6585485)
Supplement: AEM.02844-18-s0001.pdf [file AEM.02844-18-s0001.pdf]

- 1 Table S1 Differentially expressed genes in *Labrenzia aggregata* wild-type and *rpoN*  
 2 mutant strains

| Gene ID           | Description                                           | Fold<br>change( $\Delta r$<br><i>poN</i> /<br>wild-type) |
|-------------------|-------------------------------------------------------|----------------------------------------------------------|
| downregulated     |                                                       |                                                          |
| <i>st40_24680</i> | flagellar assembly protein FlaE                       | -211.88                                                  |
| <i>st40_25155</i> | flagellar L-ring protein FlgH                         | -86.75                                                   |
| <i>st40_24685</i> | flagellar hook protein FlgK                           | -82.78                                                   |
| <i>st40_09705</i> | flagellar hook capping protein                        | -49.55                                                   |
| <i>st40_24690</i> | flagellar protein                                     | -48.94                                                   |
| <i>st40_25165</i> | flagellar basal body rod protein FlgG                 | -46.85                                                   |
| <i>st40_22780</i> | MFS transporter permease                              | -40.39                                                   |
| <i>st40_25160</i> | flagellar basal body P-ring biosynthesis protein FlgA | -34.76                                                   |
| <i>st40_25120</i> | flagellar basal body P-ring biosynthesis protein FlgA | -30.03                                                   |
| <i>st40_09700</i> | hypothetical protein                                  | -28.89                                                   |
| <i>st40_25110</i> | hypothetical protein                                  | -28.13                                                   |
| <i>st40_05350</i> | hypothetical protein                                  | -27.61                                                   |
| <i>st40_25170</i> | flagellar basal body rod protein                      | -21.73                                                   |
| <i>st40_00765</i> | RNA polymerase sigma54 factor                         | -13.10                                                   |
| <i>st40_21055</i> | hypothetical protein                                  | -12.07                                                   |
| <i>st40_05345</i> | --                                                    | -11.04                                                   |
| <i>st40_10350</i> | hypothetical protein                                  | -10.81                                                   |
| <i>st40_12905</i> | hypothetical protein                                  | -10.66                                                   |
| <i>st40_18290</i> | urea ABC transporter ATP-binding protein              | -9.98                                                    |
| <i>st40_18300</i> | acylamide amidohydrolase                              | -9.62                                                    |
| <i>st40_18285</i> | --                                                    | -7.72                                                    |
| <i>st40_18295</i> | urea ABC transporter ATP-binding protein              | -7.33                                                    |
| <i>st40_18305</i> | ATPase AAA                                            | -6.52                                                    |
| <i>st40_23540</i> | C4-dicarboxylate ABC transporter                      | -6.42                                                    |
| <i>st40_18280</i> | ABC transporter permease                              | -6.40                                                    |
| <i>st40_18275</i> | ABC transporter substrate-binding protein             | -6.00                                                    |
| <i>st40_12920</i> | hypothetical protein                                  | -5.70                                                    |
| <i>st40_12915</i> | hypothetical protein                                  | -5.31                                                    |
| <i>st40_21910</i> | MFS transporter                                       | -5.26                                                    |
| <i>st40_12910</i> | hypothetical protein                                  | -5.01                                                    |
| <i>st40_14445</i> | Clp protease ClpP                                     | -4.92                                                    |
| <i>st40_18310</i> | --                                                    | -4.58                                                    |
| <i>st40_04815</i> | --                                                    | -4.57                                                    |
| <i>st40_18260</i> | hypothetical protein                                  | -4.42                                                    |
| <i>st40_23655</i> | 4-hydroxyphenylpyruvate dioxygenase                   | -4.22                                                    |

|                   |                                                      |       |
|-------------------|------------------------------------------------------|-------|
| <i>st40_00620</i> | precorrin-4 C11-methyltransferase                    | -4.12 |
| <i>st40_21915</i> | transcriptional regulator                            | -4.03 |
| <i>st40_12925</i> | TfuA-like core domain-containing protein             | -3.91 |
| <i>st40_26740</i> | acyl-CoA dehydrogenase                               | -3.82 |
| <i>st40_27660</i> | thiamine pyrophosphate-binding protein               | -3.81 |
| <i>st40_18255</i> | allantoin permease                                   | -3.75 |
| <i>st40_15130</i> | hypothetical protein                                 | -3.70 |
| <i>st40_28890</i> | formate dehydrogenase                                | -3.69 |
| <i>st40_28885</i> | formate dehydrogenase                                | -3.47 |
| <i>st40_00615</i> | precorrin-3B methylase                               | -3.44 |
| <i>st40_00590</i> | sirohydrochlorin cobaltochelatae                     | -3.43 |
| <i>st40_10325</i> | hypothetical protein                                 | -3.37 |
| <i>st40_28895</i> | formate dehydrogenase                                | -3.36 |
| <i>st40_12110</i> | chemotaxis protein                                   | -3.35 |
| <i>st40_12020</i> | 5-oxoprolinase                                       | -3.33 |
| <i>st40_28710</i> | hypothetical protein                                 | -3.29 |
| <i>st40_17865</i> | sugar ABC transporter permease                       | -3.26 |
| <i>st40_24710</i> | 2-keto-gluconate dehydrogenase                       | -3.23 |
| <i>st40_17870</i> | sugar ABC transporter substrate-binding protein      | -3.19 |
| <i>st40_08910</i> | protein hupE                                         | -3.09 |
| <i>st40_00605</i> | precorrin-6Y C5%2C15-methyltransferase               | -3.06 |
| <i>st40_10860</i> | molybdenum ABC transporter substrate-binding protein | -3.05 |
| <i>st40_05460</i> | hypothetical protein                                 | -2.96 |
| <i>st40_12930</i> | --                                                   | -2.95 |
| <i>st40_00595</i> | precorrin isomerase                                  | -2.82 |
| <i>st40_10370</i> | nitrate reductase                                    | -2.81 |
| <i>st40_04645</i> | nitrous-oxide reductase                              | -2.78 |
| <i>st40_12045</i> | C4-dicarboxylate ABC transporter permease            | -2.73 |
| <i>st40_21625</i> | amino acid dehydrogenase                             | -2.72 |
| <i>st40_06075</i> | methionine gamma-lyase                               | -2.71 |
| <i>st40_18820</i> | YHS domain-containing protein                        | -2.70 |
| <i>st40_06515</i> | hypothetical protein                                 | -2.70 |
| <i>st40_18265</i> | amino acid ABC transporter substrate-binding protein | -2.69 |
| <i>st40_12040</i> | C4-dicarboxylate ABC transporter permease            | -2.62 |
| <i>st40_00575</i> | membrane protein                                     | -2.51 |
| <i>st40_23980</i> | hypothetical protein                                 | -2.49 |
| <i>st40_26745</i> | FAD-dependent oxidoreductase                         | -2.49 |
| <i>st40_07730</i> | 2'-5' RNA ligase                                     | -2.46 |
| <i>st40_06065</i> | transketolase                                        | -2.41 |
| <i>st40_10375</i> | nitrate reductase                                    | -2.40 |
| <i>st40_15605</i> | hypothetical protein                                 | -2.38 |
| <i>st40_10365</i> | cytochrome C                                         | -2.37 |
| <i>st40_12605</i> | MFS transporter                                      | -2.36 |
| <i>st40_14980</i> | hypothetical protein                                 | -2.32 |

|                   |                                                            |       |
|-------------------|------------------------------------------------------------|-------|
| <i>st40_12035</i> | C4-dicarboxylate ABC transporter substrate-binding protein | -2.31 |
| <i>st40_16800</i> | indolepyruvate ferredoxin oxidoreductase                   | -2.30 |
| <i>st40_15600</i> | SulA-family protein                                        | -2.27 |
| <i>st40_24725</i> | ABC transporter substrate-binding protein                  | -2.25 |
| <i>st40_29480</i> | polyhydroxybutyrate depolymerase                           | -2.25 |
| <i>st40_23030</i> | peptide ABC transporter substrate-binding protein          | -2.19 |
| <i>st40_26045</i> | alanine dehydrogenase                                      | -2.19 |
| <i>st40_23125</i> | hypothetical protein                                       | -2.19 |
| <i>st40_03350</i> | hypothetical protein                                       | -2.17 |
| <i>st40_22980</i> | metallo-beta-lactamase                                     | -2.16 |
| <i>st40_25185</i> | chemotaxis protein                                         | -2.16 |
| <i>st40_18270</i> | hypothetical protein                                       | -2.15 |
| <i>st40_21655</i> | permease                                                   | -2.15 |
| <i>st40_21660</i> | C4-dicarboxylate ABC transporter permease                  | -2.11 |
| <i>st40_24520</i> | peroxidase                                                 | -2.11 |
| <i>st40_11160</i> | caspase                                                    | -2.10 |
| <i>st40_18230</i> | ABC transporter substrate-binding protein                  | -2.07 |
| <i>st40_17385</i> | haloacid dehalogenase                                      | -2.06 |
| <i>st40_28630</i> | poly(3-hydroxyalkanoate) synthetase                        | -2.06 |
| <i>st40_10790</i> | TetR family transcriptional regulator                      | -2.06 |
| <i>st40_16445</i> | hypothetical protein                                       | -2.05 |
| <i>st40_20295</i> | oxidoreductase                                             | -2.05 |
| <i>st40_17235</i> | photosynthetic protein synthase I                          | -2.04 |
| <i>st40_03670</i> | hypothetical protein                                       | -2.02 |
| <i>st40_11260</i> | Hcp1 family type VI secretion system effector              | -2.01 |
| <i>st40_25810</i> | peroxidase                                                 | -2.01 |
| <i>st40_12050</i> | transcriptional regulator                                  | -2.00 |
| upregulated       |                                                            |       |
| <i>st40_05590</i> | imidazolonepropionase                                      | 2.00  |
| <i>st40_12250</i> | MFS transporter                                            | 2.00  |
| <i>st40_28975</i> | acetyltransferase                                          | 2.01  |
| <i>st40_13590</i> | 30S ribosomal protein S21                                  | 2.01  |
| <i>st40_22390</i> | sugar ABC transporter ATP-binding protein                  | 2.02  |
| <i>st40_14030</i> | XRE family transcriptional regulator                       | 2.03  |
| <i>st40_13925</i> | chromate resistance protein ChrB                           | 2.04  |
| <i>st40_17680</i> | TetR family transcriptional regulator                      | 2.04  |
| <i>st40_27005</i> | signal peptide protein                                     | 2.04  |
| <i>st40_02865</i> | Na/Pi cotransporter                                        | 2.06  |
| <i>st40_08970</i> | hydrolase                                                  | 2.07  |
| <i>st40_04380</i> | recombinase RecF                                           | 2.09  |
| <i>st40_01240</i> | response regulator receiver protein                        | 2.10  |
| <i>st40_05620</i> | tripartite transporter                                     | 2.10  |
| <i>st40_27990</i> | tRNA-Met                                                   | 2.11  |

|                   |                                                                |      |
|-------------------|----------------------------------------------------------------|------|
| <i>st40_13380</i> | Holliday junction resolvase                                    | 2.11 |
| <i>st40_16260</i> | septum formation initiator                                     | 2.13 |
| <i>st40_17005</i> | homospermidine synthase                                        | 2.14 |
| <i>st40_03025</i> | 50S ribosomal protein L33                                      | 2.15 |
| <i>st40_00235</i> | septum formation inhibitor Maf                                 | 2.20 |
| <i>st40_09710</i> | hypothetical protein                                           | 2.22 |
| <i>st40_26070</i> | --                                                             | 2.24 |
| <i>st40_14240</i> | hypothetical protein                                           | 2.26 |
| <i>st40_17335</i> | hypothetical protein                                           | 2.34 |
| <i>st40_04585</i> | dihydroxyacetone kinase                                        | 2.36 |
| <i>st40_04970</i> | hypothetical protein                                           | 2.47 |
| <i>st40_27065</i> | YeeE/YedE                                                      | 2.54 |
| <i>st40_21265</i> | hypothetical protein                                           | 2.57 |
| <i>st40_29650</i> | tRNA-Ile                                                       | 2.59 |
| <i>st40_00240</i> | translation initiation factor IF-1                             | 2.70 |
| <i>st40_04845</i> | ABC transporter substrate-binding protein                      | 2.70 |
| <i>st40_19230</i> | hypothetical protein                                           | 2.71 |
| <i>st40_21350</i> | beta-lactamase TEM                                             | 2.73 |
| <i>st40_28775</i> | glycerol-3-phosphate transporter ATP-binding subunit           | 2.74 |
| <i>st40_16995</i> | GCN5 family acetyltransferase                                  | 2.78 |
| <i>st40_22630</i> | conjugal transfer protein TrbE                                 | 2.99 |
| <i>st40_29215</i> | glycerol 3-phosphate ABC transporter substrate-binding protein | 3.05 |
| <i>st40_14225</i> | Dtr system oriT relaxase                                       | 3.07 |
| <i>st40_13685</i> | tRNA-Val                                                       | 3.08 |
| <i>st40_18355</i> | ATPase                                                         | 3.08 |
| <i>st40_04535</i> | sugar ABC transporter substrate-binding protein                | 3.12 |
| <i>st40_00290</i> | tRNA-Thr                                                       | 3.15 |
| <i>st40_14235</i> | conjugal transfer protein TraB                                 | 3.18 |
| <i>st40_19225</i> | phosphoadenosine phosphosulfate reductase                      | 3.30 |
| <i>st40_22645</i> | --                                                             | 3.32 |
| <i>st40_14205</i> | conjugal transfer protein TraG                                 | 3.39 |
| <i>st40_27975</i> | tRNA-Ala                                                       | 3.40 |
| <i>st40_14215</i> | hypothetical protein                                           | 3.46 |
| <i>st40_09150</i> | 5'-nucleotidase                                                | 3.49 |
| <i>st40_19220</i> | sulfite reductase                                              | 3.65 |
| <i>st40_27070</i> | sulfurtransferase                                              | 4.13 |
| <i>st40_19910</i> | ABC transporter ATP-binding protein                            | 4.20 |
| <i>st40_19915</i> | DeoR family transcriptional regulator                          | 4.23 |
| <i>st40_19905</i> | ABC transporter substrate-binding protein                      | 4.32 |
| <i>st40_07835</i> | tRNA-Leu                                                       | 4.56 |
| <i>st40_19210</i> | siroheme synthase                                              | 4.86 |
| <i>st40_16955</i> | hypothetical protein                                           | 5.15 |
| <i>st40_19215</i> | sulfite reductase                                              | 5.27 |

|                   |                                                             |       |
|-------------------|-------------------------------------------------------------|-------|
| <i>st40_29510</i> | 5-deoxyglucuronate isomerase                                | 9.86  |
| <i>st40_29490</i> | 3D-(3%2C5/4)-trihydroxycyclohexane-1%2C2-dione<br>hydrolase | 11.47 |
| <i>st40_29505</i> | inosose dehydratase                                         | 12.46 |
| <i>st40_29500</i> | 3D-(3%2C5/4)-trihydroxycyclohexane-1%2C2-dione<br>hydrolase | 13.03 |
| <i>st40_24265</i> | myo-inositol 2-dehydrogenase                                | 18.69 |
| <i>st40_24255</i> | RpiR family transcriptional regulator                       | 20.03 |
| <i>st40_29495</i> | 5-dehydro-2-deoxygluconokinase                              | 20.81 |
| <i>st40_24260</i> | inositol 2-dehydrogenase                                    | 22.79 |
| <i>st40_24245</i> | ATPase                                                      | 30.09 |
| <i>st40_24240</i> | ABC transporter ATP-binding protein                         | 47.01 |
| <i>st40_24250</i> | sugar ABC transporter substrate-binding protein             | 74.44 |

3

4

5 Table S2 OD<sub>570</sub> values from the GN2 MicroPlate kit (Biolog) of *L. aggregata*

6 LZB033

|   | 1    | 2    | 3    | 4    | 5    | 6    | 7    | 8    | 9    | 10   | 11   | 12   |
|---|------|------|------|------|------|------|------|------|------|------|------|------|
| A | 0    | 0.05 | 0.34 | 0.09 | 0    | 0.01 | 0.21 | 0.37 | 0.54 | 0.41 | 0.54 | 0.57 |
|   |      | 8    |      |      |      | 2    | 8    | 4    | 5    | 4    | 2    | 4    |
| B | 0.43 | 0.52 | 0.45 | 0.47 | 0.28 | 0.64 | 0.38 | 0.14 | 0.14 | 0.64 | 0.56 | 0.19 |
|   | 8    | 8    | 6    | 2    | 2    | 9    | 5    | 6    | 9    | 6    | 2    | 6    |
| C | 0.27 | 0.13 | 0.16 | 0.14 | 0.17 | 0.49 | 0.74 | 0.63 | 0.19 | 0.05 | 0.37 | 0.54 |
|   | 8    | 1    | 1    | 8    | 4    | 1    | 1    | 4    | 1    | 4    | 9    | 6    |
| D | 0.17 | 0.47 | 0.13 | 0.17 | 0.09 | 0.12 | 0.56 | 0.14 | 0.43 | 0.54 | 0.84 | 0.08 |
|   | 1    | 7    |      | 6    |      | 9    | 5    | 9    | 8    |      | 1    | 4    |
| E | 0.30 | 0.50 | 0.55 | 0.36 | 0.19 | 0.58 | 0.10 | 0.45 | 0.09 | 0.27 | 0    | 0.56 |
|   | 6    | 2    | 4    | 5    | 4    | 2    | 2    | 7    | 4    |      |      |      |
| F | 0.49 | 0.13 | 0.14 | 0.50 | 0.08 | 0.40 | 0.47 | 0.11 | 0.11 | 0.59 | 0.13 | 0.34 |
|   | 1    | 6    | 7    | 4    | 7    | 5    | 8    |      | 5    | 5    | 5    | 9    |
| G | 0.28 | 0.26 | 0.29 | 0.27 | 0.31 | 0.37 | 0.56 | 0.06 | 0.08 | 0.44 | 0.10 | 0.14 |
|   |      | 4    | 8    | 6    | 2    | 1    | 2    | 8    | 5    | 6    | 4    | 1    |
| H | 0.26 | 0.24 | 0.14 | 0.13 | 0.06 | 0.07 | 0.10 | 0.11 | 0.58 | 0.11 | 0.45 | 0.37 |
|   | 6    |      | 1    | 4    | 8    | 5    | 8    | 9    | 3    | 9    |      |      |

7

8

9 Table S3 OD<sub>570</sub> values from the GN2 MicroPlate kit (Biolog) of *L. aggregata*  $\Delta$ rp*oN*\*

|   | 1         | 2         | 3         | 4         | 5         | 6         | 7         | 8         | 9         | 10        | 11        | 12        |
|---|-----------|-----------|-----------|-----------|-----------|-----------|-----------|-----------|-----------|-----------|-----------|-----------|
| A | 0         | 0.03<br>5 | 0.37<br>8 | 0.10<br>9 | 0         | 0         | 0.16<br>3 | 0.18<br>4 | 0.68      | 0.13<br>2 | 0.63<br>4 | 0.66      |
| B | 0.39<br>6 | 0.34<br>3 | 0.21<br>7 | 0.28<br>8 | 0.21<br>9 | 0.48<br>1 | 0.23<br>9 | 0         | 0.23<br>4 | 0.38<br>5 | 0.35<br>1 | 0.10<br>1 |
| C | 0.27<br>2 | 0.05<br>2 | 0.15<br>6 | 0.03<br>8 | 0.13<br>7 | 0.33      | 0.36<br>9 | 0.45<br>9 | 0.17<br>8 | 0         | 0.20<br>8 | 0.29      |
| D | 0.15      | 0.35<br>4 | 0.05<br>8 | 0.16<br>9 | 0.04<br>7 | 0.17<br>8 | 0.52      | 0         | 0.42<br>6 | 0.35<br>7 | 0.55<br>7 | 0.07<br>0 |
| E | 0.26<br>2 | 0<br>3    | 0.49<br>3 | 0<br>3    | 0.06<br>0 | 0.48<br>0 | 0         | 0.30<br>6 | 0         | 0.18<br>5 | 0         | 0.11<br>4 |
| F | 0<br>3    | 0.04<br>3 | 0.11<br>8 | 0.35<br>9 | 0         | 0.21<br>8 | 0.27<br>5 | 0.33<br>6 | 0.13<br>6 | 0.36<br>6 | 0.12<br>7 | 0.36<br>2 |
| G | 0.23<br>5 | 0.18<br>4 | 0.25<br>4 | 0.23<br>1 | 0.25<br>7 | 0.39<br>8 | 0.43<br>9 | 0         | 0.15<br>8 | 0.29<br>7 | 0.34<br>3 | 0.18<br>0 |
| H | 0.44<br>6 | 0.22<br>3 | 0.07<br>1 | 0.14<br>5 | 0.00<br>2 | 0         | 0.17<br>1 | 0         | 0.55<br>2 | 0.24<br>1 | 0.31<br>9 | 0.30<br>0 |

10 \*: Values from wells highlighted in green were reductions. While those in red were  
 11 increases.  
 12

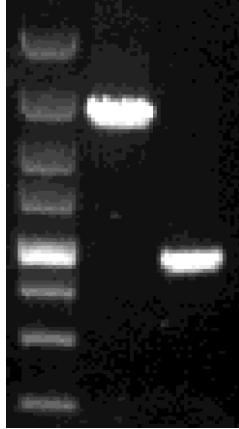

13

14 Figure S1 PCR confirmation of the construction of  $\Delta rpoN$ . From left to right: DL5000

15 DNA marker, wild-type,  $\Delta rpoN$ .

16



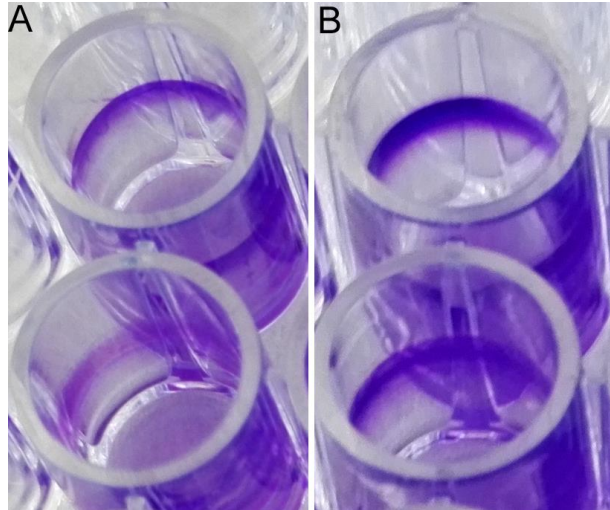

17

18 Figure S2 Stain of biofilm formed by *L. aggregata* strains incubated for (A) 24 h and

19 (B) 48 h, upper: LZB033, down:  $\Delta rpoN$ .
